# Supplementary material for: Alteration of the unfolded protein response modifies neurodegeneration in a mouse model of Marinesco–Sjögren syndrome
Source: PubMed Central journal article supplement — Hum Mol Genet. 2009 Oct 3;19(1):25–35. doi: 10.1093/hmg/ddp464 (PMC2792147; doi:10.1093/hmg/ddp464), 2009-10-03
Supplement: ddp464_1.pdf [file ddp464_1.pdf]

## Supplementary data

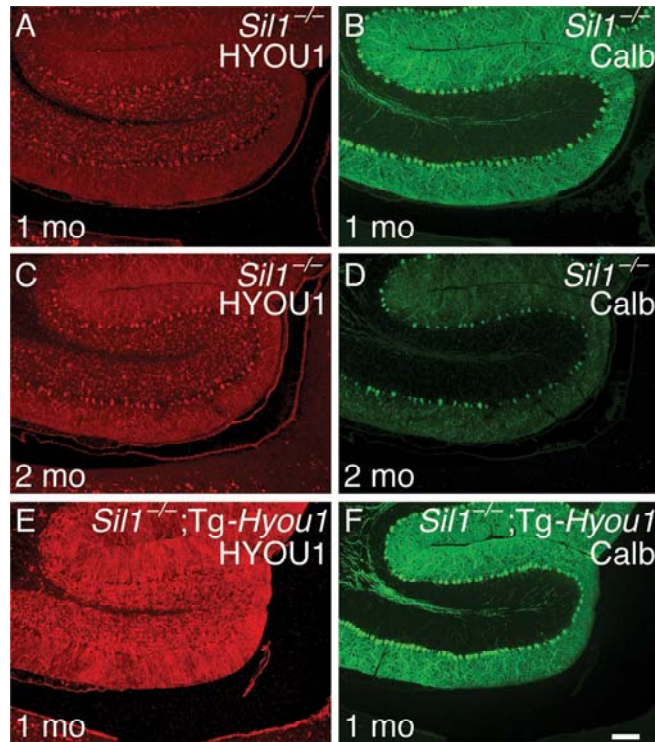

**Supplementary figure 1. A *Hyou1* transgene confers constitutively elevated cerebellar expression.** Cerebellar sections from 1-month-old (A, B), 2-month-old (C, D) *Sil1*<sup>-/-</sup> and 1-month-old *Sil1*<sup>-/-</sup>; Tg-*Hyou1* (E, F) mice were immunostained with antibodies to HYOU1 (A, C, E) and calbindin-D28 (Calb; B, D, F). Images of lobule II are shown. Camera exposure times are equal for images of the same channel. Scale bar=100  $\mu$ m.

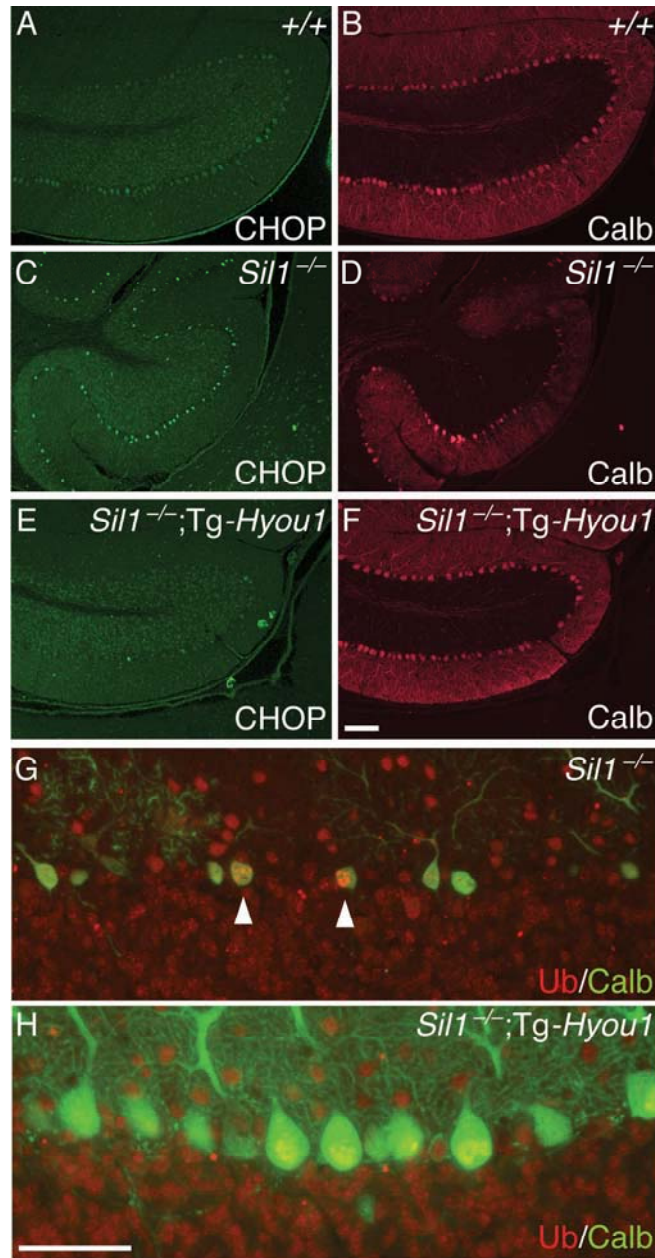

**Supplementary figure 2. Cerebellar overexpression of HYOU1 in cerebella prevents ER stress caused by loss of SIL1 function.** **A-F.** Activation of CHOP is suppressed by expression of *Hyou1* transgene in the *Sil1*<sup>-/-</sup> cerebellum. Cerebellar sections from 2-month-old wild type (A, B), *Sil1*<sup>-/-</sup> (C, D), and *Sil1*<sup>-/-</sup>; Tg-*ORP150* (E, F) mice were incubated with antibodies against CHOP (A, C, E) and calbindin-D28 (B, D, F), respectively. Images of lobule II are shown. Camera exposure times are equal for images of the same channel. Scale bar: 100  $\mu$ m. **G-H.** Overexpression of HYOU1 suppresses formation of protein inclusions caused by *Sil1* deficiency. Cerebellar sections from 3-month-old *Sil1*<sup>-/-</sup> (G) and *Sil1*<sup>-/-</sup>; Tg-*Hyou1* (H) mice were immunostained with antibodies against ubiquitin (Ub; red) and calbindin-D28 (Calb; green). Merged images are shown. Note the ubiquitin-positive protein inclusions (G; arrowheads) in *Sil1*<sup>-/-</sup> Purkinje cells. Inclusions were not observed in *Sil1*<sup>-/-</sup>; Tg-*Hyou1* neurons (H). Scale bar: 50  $\mu$ m.

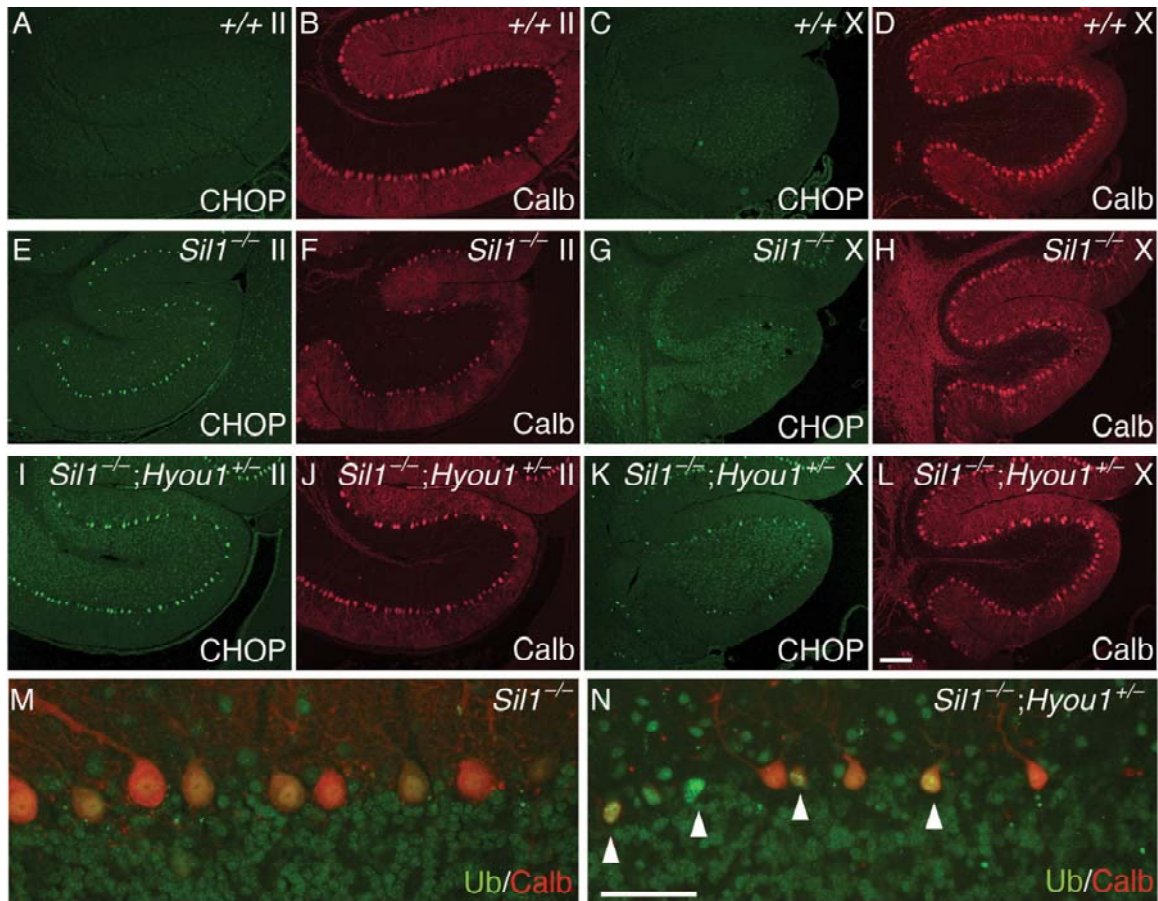

**Supplementary figure 3. Reduced *Hyou1* expression aggravates ER stress caused by loss of *SIL1* function.** **A-L.** CHOP upregulation in lobule II or lobule X of 2-month-old wild type (+/+; A-D), 2-month-old *Sil1*<sup>-/-</sup> (E-H), and 1-month-old (I-L) *Sil1*<sup>-/-</sup>; *Hyou1*<sup>+/-</sup> cerebella. Sections were immunostained with antibodies against BiP and calbindin-D28 (Calb). Camera exposure times are equal for images of the same channel. Scale bar: 100 μm. **M-N.** Reduced *Hyou1* expression accelerates formation of protein inclusions caused by *Sil1* deficiency. Cerebellar sections from 2-month-old *Sil1*<sup>-/-</sup> (M) and *Sil1*<sup>-/-</sup>; *Hyou1*<sup>+/-</sup> (N) mice were immunostained with antibodies to ubiquitin (Ub; green) and calbindin-D28 (Calb; red). Merged images are shown. Note the presence of ubiquitin-positive protein inclusions (N; arrowheads) in *Sil1*<sup>-/-</sup>; *Hyou1*<sup>+/-</sup> Purkinje cells at this age. Inclusions were not observed in Purkinje cells of age-matched *Sil1*<sup>-/-</sup> mice (M). Scale bar: 50 μm.

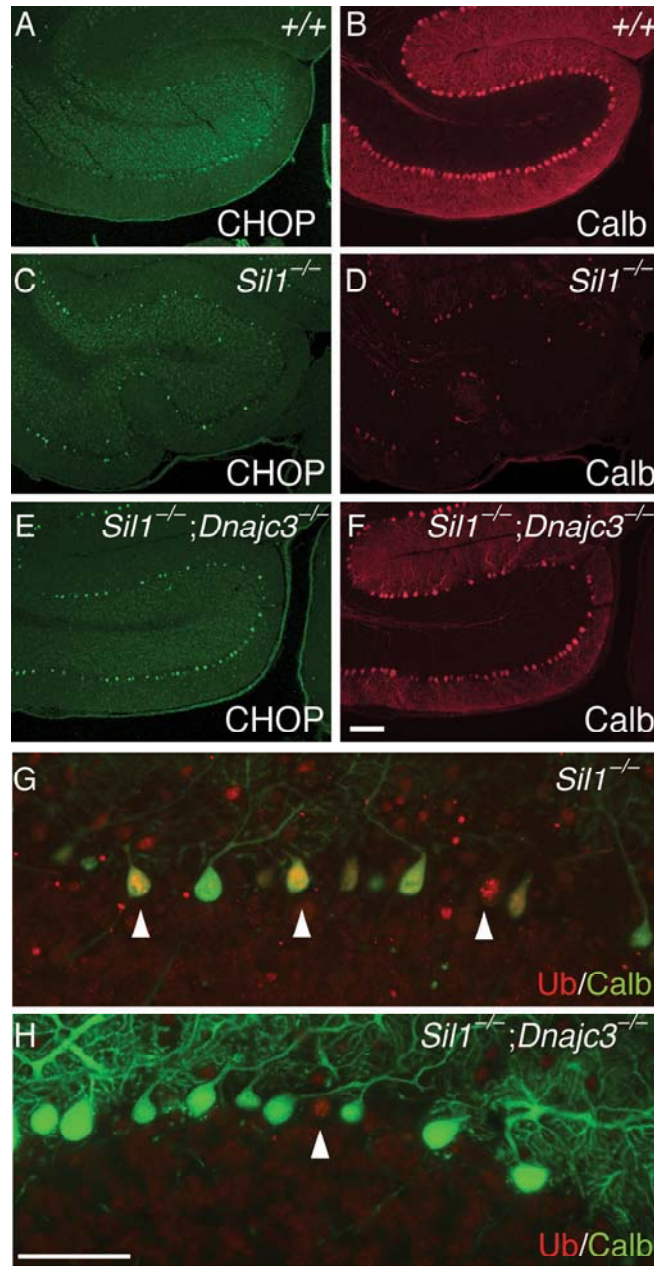

**Supplementary figure 4. Depletion of DNAJC3 activity does not suppress CHOP upregulation caused by *Sil1* deficiency.** A-F. Expression of CHOP in cerebellar Purkinje cells of 3-month-old wild type (A, B), *Sil1*<sup>-/-</sup> (C, D) and *Sil1*<sup>-/-</sup>; *Dnajc3*<sup>-/-</sup> (E, F) mice. Sections were stained with antibodies against CHOP (A, C, E) and calbindin-D28 (Calb; B, D, F). Images of lobule II are shown. Scale bar: 100  $\mu$ m. G-H. Loss of DNAJC3 function suppresses formation of protein inclusions caused by *Sil1*-deficiency. Cerebellar sections from 3-month-old *Sil1*<sup>-/-</sup> (G) and *Sil1*<sup>-/-</sup>; *Dnajc3*<sup>-/-</sup> (H) mice were immunostained with antibodies to ubiquitin (Ub; red) and calbindin-D28 (Calb; green). Merged images are shown. Note the presence of ubiquitin-positive protein inclusions in (G; arrowheads) *Sil1*<sup>-/-</sup> Purkinje cells. Fewer inclusions (H; arrowhead) are observed in *Sil1*<sup>-/-</sup>; *Dnajc3*<sup>-/-</sup> Purkinje cells. Scale bar: 50  $\mu$ m.

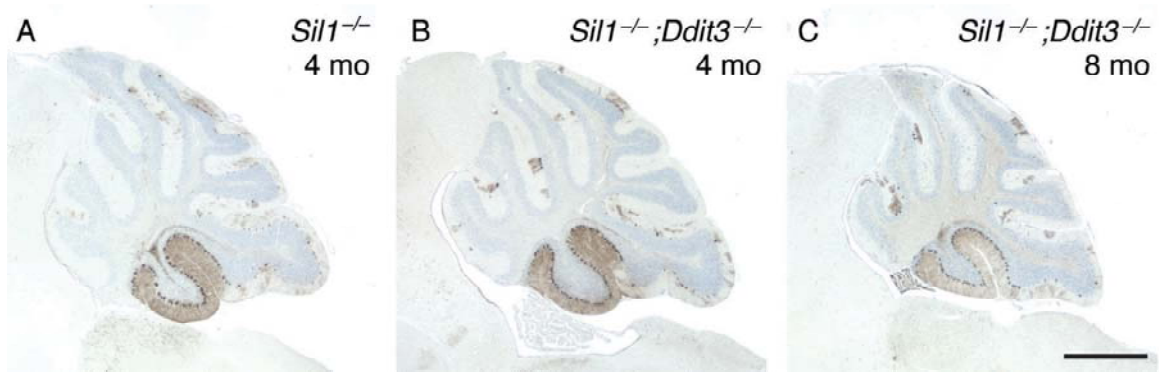

**Supplementary figure 5. Deletion of *Chop* does not alter Purkinje cell degeneration caused by ER stress.** Cerebella from 4-month-old *Sil1*<sup>-/-</sup> (A) and 4- or 8-month old *Sil1*<sup>-/-</sup> *Dnajc3*<sup>-/-</sup> (C, D) mice were immunostained with antibodies to calbindin D-28. Scale bar: 100  $\mu$ m.
